# Supplementary material
Source: MDPI journal article supplement (https://www.mdpi.com/2075-163X/9/5/261)
Supplement: s1 [file s1]

## Sheet: Лист1
Table S1. Major-(wt. %) and trace- (ppm) element composition of garnet, and estimated temperature (°C)
With fractionated MREE-HREE
	subgroup 1															subgroup 2
	1	2	11	16	59	75	80	126	135	157	168	170	213	177	206	17	19	29	52	66	73	97	109	111	112	114	132	137	136	139	143	152	162	162	169	172	187	208	211	212
SiO2	41.966	41.779	42.012	41.927	42.319	41.934	42.175	42.03	42.194	42.305	41.793	42.134	41.959	41.603	41.335	42.101	42.084	42.144	41.904	42.092	41.922	41.942	41.861	41.822	41.911	42.104	41.967	42.375	41.879	42.016	42.045	41.759	41.527	41.527	42.29	41.823	41.914	41.98	41.974	41.771
TiO2	0.078	0.101	0.02	0.012	0.02	0.051	0.01	0.01	0.058	0.042	0.01	0.033	0.09	0.01	0.023	0.031	0.056	0.076	0.052	0.092	0.12	0.073	0.059	0.122	0.067	0.098	0.109	0.044	0.072	0.167	0.068	0.097	0.088	0.088	0.063	0.085	0.157	0.085	0.089	0.057
Al2O3	22.661	21.696	22.09	21.859	22.38	21.249	21.836	21.694	22.045	22.299	20.961	22.181	21.565	22.646	22.257	22.303	22.102	22.304	20.957	22.269	21.765	22.176	21.915	21.169	21.747	22.175	22.36	22.785	21.365	21.842	21.523	22.192	20.627	20.627	22.293	22.639	21.08	22.418	22.136	22.343
Cr2O3	1.173	2.174	1.911	2.154	1.56	2.743	2.456	2.425	1.947	1.675	3.359	1.706	2.348	0.779	1.063	1.51	1.746	1.545	3.251	1.633	1.955	1.706	1.913	2.934	2.11	1.593	1.249	0.999	2.803	2.05	2.535	1.56	3.478	3.478	1.635	1.08	2.815	1.135	1.59	1.39
FeO	8.824	9.219	9.064	8.288	7.976	8.911	7.743	7.142	8.204	7.201	7.733	8.646	8.211	10.344	12.768	8.044	8.755	7.831	8.29	8.753	9.357	8.813	9.398	8.793	8.735	8.622	9.492	8.439	8.586	7.992	8.388	9.26	9.365	9.365	8.396	9.238	8.463	8.269	8.778	9.422
MnO	0.369	0.435	0.478	0.478	0.368	0.433	0.468	0.389	0.382	0.303	0.414	0.436	0.368	0.455	0.548	0.397	0.417	0.342	0.464	0.423	0.434	0.465	0.525	0.439	0.434	0.374	0.403	0.466	0.551	0.344	0.482	0.45	0.506	0.506	0.469	0.423	0.389	0.322	0.465	0.503
MgO	19.773	19.287	19.098	19.467	19.996	19.262	20.503	19.646	20.281	20.472	19.022	19.287	19.776	18.301	16.308	20.038	19.657	19.99	18.992	19.596	19.144	19.531	18.754	19.125	19.102	19.574	19.245	19.858	19.109	19.868	19.351	19.149	18.569	18.569	19.932	19.299	19.815	19.928	19.292	19.071
CaO	5.133	5.124	5.479	5.576	5.399	5.303	4.494	6.087	4.643	5.447	6.6	5.481	5.313	5.682	5.782	5.212	5.207	5.484	6.027	5.207	5.094	5.125	5.729	5.661	5.911	5.313	5.18	5.143	6.07	5.343	5.701	5.271	5.875	5.875	5.241	5.13	5.275	5.21	5.392	5.181
Na2O	0.022	0.005	0.056	0.009	0.054	0.045	0.063	0	0	0.004	0	0.047	0.021	0.013	0	0	0	0.02	0.044	0.034	0.052	0.033	0.001	0	0.066	0.044	0	0.026	0.014	0	0.006	0	0.029	0.029	0.022	0.033	0.04	0.074	0	0.021
Total	99.999	99.82	100.208	99.77	100.072	99.931	99.738	99.413	99.754	99.748	99.882	99.951	99.651	99.823	100.084	99.636	100.024	99.736	99.981	100.099	99.843	99.864	100.155	100.065	100.083	99.897	100.005	100.135	100.449	99.622	100.099	99.738	100.064	100.064	100.341	99.75	99.948	99.421	99.716	99.759
mg#	0.799764	0.78854	0.789723	0.807196	0.817138	0.793938	0.825168	0.830597	0.815032	0.835184	0.814282	0.799042	0.81107	0.759242	0.694808	0.816181	0.800079	0.819819	0.803284	0.799618	0.784797	0.797986	0.780553	0.794949	0.795831	0.801845	0.783263	0.807481	0.798671	0.815876	0.804384	0.786596	0.779455	0.779455	0.80885	0.7883	0.806701	0.811164	0.79664	0.782977
Ni ppm	23.7412	23.4728	18.5399	19.4944	32.951	22.3721	22.3416	28.6901	19.9461	34.6161	23.8282	20.9214	39.1767	43.8846	31.0535	19.57	23.5268	22.0713	20.9531	25.6983	19.3082	27.2065	18.4174	23.434	29.8497	31.4912	18.658	24.814	19.1122	38.8791	28.5174	15.5193	23.7068	26.9845	28.5771	22.7406	34.3879	25.2669	23.1697	21.477
T	870.898	868.093	812.869	824.169	958.11	856.4	856.072	919.699	829.403	972.389	871.802	840.473	1009.74	1046.01	941.36	825.049	868.66	853.148	840.828	890.82	821.99	905.599	811.394	867.688	930.443	945.271	814.286	881.928	819.684	1007.37	918.079	774.649	870.539	903.453	918.64	860.352	970.454	886.504	864.906	846.646
Cs	0.06367	0.0414768	0.060467	0.0296289	0.313132	0.039049	b.d.l.	0.137541	0.304944	0.160069	b.d.l.	b.d.l.	0.103538	b.d.l.	b.d.l.	b.d.l.	b.d.l.	0.207707	1.19444	0.31207	0.0388799	0.245934	b.d.l.	0.263863	0.221898	0.126124	0.206346	0.114872	0.013615	0.549258	0.368818	0.117246	0.0465905	0.0584083	b.d.l.	b.d.l.	b.d.l.	b.d.l.	0.481824	0.127192
Rb	b.d.l.	b.d.l.	b.d.l.	0.190279	0.718121	0.0667324	b.d.l.	0.669251	0.105154	0.117897	0.116706	0.0678881	0.0163823	b.d.l.	b.d.l.	b.d.l.	0.212048	0.125715	2.53302	0.643859	0.0220221	b.d.l.	b.d.l.	0.0223335	0.0398646	b.d.l.	0.117761	b.d.l.	b.d.l.	0.268811	0.115631	0.480052	0.0566917	0.0962942	b.d.l.	b.d.l.	b.d.l.	b.d.l.	1.76705	0.0624836
Ba	0.0161919	0.0146614	0.371025	0.484517	1.80708	0.0508449	b.d.l.	5.80597	0.153865	0.167203	0.906565	0.906547	0.0274327	0.679381	b.d.l.	0.15187	1.95765	2.11656	9.97566	2.12735	b.d.l.	0.354671	0.00609283	0.00126282	0.0508265	0.0270715	0.0190897	0.00177446	b.d.l.	0.574493	0.0058846	4.31129	0.125227	0.00215867	0.0238721	0.195033	0.00637932	0.345052	3.77957	2.2734
Th	0.0136552	0.00969067	0.0139851	0.00808339	0.0601337	0.00658711	0.000303434	0.123382	0.00612476	0.013572	0.0526904	0.057628	0.0178362	0.049643	0.00048811	0.0764069	0.23195	0.00494344	0.168692	0.077581	0.000988403	0.0202363	0.0045983	0.0041094	0.000551659	0.00113865	b.d.l.	0.00774369	0.00466565	0.0424261	0.000687877	0.0735916	0.0194736	0.0245951	0.0562054	0.010042	0.00114427	0.00154516	0.101216	0.000952517
U	0.0157529	0.00012518	0.00304506	0.00647293	0.0159557	0.00734724	0.00500461	0.0378509	0.00531965	0.00485909	0.00670563	0.0102759	0.0369225	0.011949	0.00147722	0.0150478	0.0323587	0.00135836	0.0641563	0.0363879	0.00102365	0.00450593	0.0028635	0.0107369	0.00154825	0.00244362	0.000253876	0.0186114	0.0100342	0.0823671	0.00440909	0.0120466	0.0115485	0.0112162	0.0636579	0.00595809	0.00201104	0.00156411	0.0305949	0.00151778
Nb	0.0075298	0.00966193	0.0203089	0.025824	0.08566	0.0333875	0.0319864	0.174238	0.0317776	0.0637506	0.0535591	0.0684341	0.318502	0.0614626	0.0170215	0.0128494	0.259729	0.0249172	0.461685	0.0610249	0.0058291	0.0262946	0.0125329	0.0520611	0.0168907	0.0659366	0.00389979	0.0267043	0.171477	0.0279949	0.0669218	0.159847	0.105449	0.0454753	0.0134158	0.0383933	0.0811654	0.00806596	0.346251	0.0203367
Ta	b.d.l.	0.000268685	0.00104571	0.00175116	0.01553	0.000372611	0.00144157	0.0103564	0.00249283	0.00153168	0.00306759	0.00444966	0.00332497	0.00179838	0.00029043	0.000291908	0.00917781	0.00333229	0.0268678	0.00220474	b.d.l.	0.00169951	0.000279927	0.00480219	0.000248963	b.d.l.	b.d.l.	0.000239595	0.00685719	0.000347908	0.00371085	0.0134712	0.00733071	0.00116928	0.00273466	0.00108935	0.00406566	0.000282982	0.0187575	0.00109766
La	0.0165106	0.0104672	0.0429617	0.0290105	0.218973	0.0188377	0.00551511	0.371198	0.0312039	0.0390638	0.176914	0.116525	0.0435691	0.0886846	0.00287221	0.242688	0.484695	0.058985	0.952847	0.1377	0.00260341	0.047071	0.00947001	0.008089	0.00986146	0.0469472	0.00254463	0.0078579	0.0106163	0.0517657	0.00707042	0.29427	0.0278753	0.0323388	0.0381539	0.0627399	0.00295486	0.0149711	0.224048	0.0090402
Ce	0.123849	0.031214	0.143769	0.110518	0.313111	0.0714628	0.0589038	0.904628	0.116035	0.122517	0.248179	0.212412	0.157645	0.246164	0.0215296	0.445092	1.0588	0.147642	2.38036	0.32928	0.0170401	0.136462	0.11525	0.0921399	0.033659	0.112569	0.00853486	0.137018	0.160241	0.237542	0.139189	0.435714	0.143114	0.218356	0.305243	0.163488	0.0381739	0.142767	0.443372	0.0374407
Pr	0.041581	0.00451808	0.0272144	0.0118144	0.0519353	0.019905	0.0234605	0.0909217	0.0218549	0.0221308	0.0453433	0.0347935	0.0273966	0.0395278	0.00725079	0.0951693	0.132559	0.0185769	0.204568	0.0631746	0.0108946	0.0233696	0.0615703	0.0345944	0.00824058	0.0147894	0.00369888	0.0716267	0.0644336	0.0887373	0.065848	0.0542818	0.0471028	0.060624	0.0862119	0.0196246	0.0104898	0.0806878	0.054061	0.011607
Sr	0.0901439	0.00662643	0.0920783	0.153585	0.784751	0.0659957	0.0347783	1.01228	0.0714937	0.122123	0.272642	0.159781	0.031493	0.47694	0.0148431	0.8327	0.333475	0.269848	17.6754	0.40041	0.05309	0.0880353	0.311231	0.0838059	0.0505728	0.135251	0.0287436	0.100147	0.135405	0.181193	0.132284	0.80772	0.0821919	0.204439	0.0763884	0.19914	0.0321106	0.174183	1.37588	0.0642659
Nd	0.385714	0.0409959	0.162053	0.0607935	0.203568	0.118464	0.175232	0.386469	0.206115	0.0698028	0.129409	0.134857	0.146684	0.400218	0.120331	0.968096	0.64688	0.284592	0.9903	0.437695	0.202863	0.19634	0.71911	0.485061	0.18155	0.12524	0.166491	0.831232	0.745461	0.892016	0.656463	0.377004	0.449146	0.833819	0.641214	0.18255	0.17534	1.00155	0.33408	0.114534
Zr	5.67845	1.18821	1.87085	1.54653	8.65963	3.17966	2.33603	6.91124	4.5868	7.045	1.00454	4.01369	0.33589	2.25636	6.45727	10.3	11.1624	36.2711	10.081	9.22994	12.433	8.11186	14.6036	13.4651	15.811	19.6416	32.7522	16.5525	18.0906	21.8283	8.70808	16.4863	14.5573	56.6492	11.2627	15.9065	7.80531	12.6526	21.0411	7.47598
Hf	0.116187	0.0742297	0.0552132	0.0492684	0.264283	0.0967208	0.0526333	0.221888	0.122001	0.270156	0.0268419	0.112703	0.0315082	0.0358702	0.0537054	0.106964	0.273252	0.601816	0.312836	0.243777	0.185101	0.184702	0.194516	0.365944	0.236361	0.574435	0.797727	0.228581	0.352667	0.390154	0.225454	0.316467	0.217398	1.31159	0.216297	0.389117	0.171639	0.355396	0.492323	0.143361
Sm	0.230949	0.150118	0.107552	0.0550485	0.182543	0.0877465	0.158203	0.116389	0.143961	0.106316	0.0454084	0.13106	0.148912	0.177521	0.187666	0.653399	0.326465	0.649608	0.501613	0.290033	0.38854	0.21561	0.543595	0.446365	0.447325	0.393021	0.565859	0.796086	0.473914	0.796763	0.465818	0.444886	0.593571	1.15579	0.412713	0.359405	0.277028	0.49982	0.489311	0.267702
Eu	0.147345	0.131176	0.0709076	0.0521512	0.176569	0.0941658	0.108121	0.0613521	0.0921283	0.112432	0.0104689	0.103535	0.112183	0.118015	0.108396	0.278033	0.155998	0.485172	0.211897	0.213309	0.339925	0.200179	0.28048	0.266416	0.335413	0.316287	0.413364	0.450124	0.211073	0.390695	0.219903	0.304215	0.41999	0.707606	0.284165	0.302678	0.209635	0.21449	0.327501	0.236055
Ti	479.588	898.306	172.654	97.2972	447.68	193.703	335.74	187.964	575.51	334.592	101.603	301.762	634.215	188.016	188.785	251.678	705.628	1231.29	633.729	656.941	976.925	672.41	519.684	1300.08	734.85	1168.53	1433.13	556.877	570.477	1752.02	656.426	1066.9	831.569	2408.51	682.764	956.915	1131.27	733.572	1134.76	464.978
Gd	0.818495	0.842724	0.644584	0.34386	1.35717	0.724948	0.699244	0.550848	0.608316	0.994068	0.0394568	0.765325	0.681381	0.536909	0.564052	1.23772	1.07435	2.61704	1.27354	1.32511	1.75314	1.19094	1.20852	1.46973	1.8707	2.01846	2.59554	2.45583	1.04568	1.70507	1.11224	1.77141	1.95427	3.68721	1.88952	1.5732	1.02471	1.01771	1.91692	1.42328
Tb	0.2588	0.260441	0.213457	0.131948	0.461865	0.252009	0.212626	0.250749	0.209836	0.352017	0.0172307	0.272349	0.216004	0.16172	0.144294	0.290546	0.304041	0.758616	0.314961	0.37489	0.473293	0.370979	0.291429	0.360792	0.45891	0.596334	0.711641	0.718503	0.270905	0.491658	0.253769	0.478987	0.511207	0.99141	0.552201	0.486371	0.283035	0.297864	0.492002	0.419497
Dy	2.61438	2.40204	2.57236	1.67792	5.05915	3.23046	2.20419	3.83144	2.24151	4.11061	0.312149	3.13731	2.01229	1.65595	1.15245	3.08865	3.09683	7.29962	3.34654	3.77492	4.01718	3.56574	2.59259	3.20867	4.25274	5.7195	7.00696	7.80401	2.62004	4.7643	2.29902	4.37084	4.24145	9.59972	5.77355	4.64593	2.53592	3.10687	4.45587	3.90955
Y	18.8162	16.993	20.7842	16.1109	39.4101	26.4087	15.8851	45.9632	18.764	34.9024	4.99418	23.8714	14.3977	12.0303	7.43208	24.0268	22.7557	50.706	23.8529	26.2885	25.8721	25.3257	17.3936	21.0499	28.3692	41.1586	49.1444	69.6137	18.9821	33.289	17.0126	31.3218	26.9163	64.7905	42.1268	32.2437	16.3389	24.2479	30.6747	25.8618
Ho	0.669957	0.641278	0.748333	0.552684	1.38597	0.94422	0.57536	1.54609	0.625786	1.21364	0.144057	0.879658	0.50593	0.451389	0.268379	0.843226	0.845154	1.88529	0.874329	0.985988	0.967357	0.923213	0.6385	0.761991	1.00713	1.51149	1.85211	2.37981	0.665127	1.25966	0.623305	1.11378	0.97823	2.47325	1.51776	1.18078	0.610482	0.834701	1.16859	0.917529
Er	2.25356	2.10443	2.54379	2.30022	5.21082	3.55429	2.01119	7.53927	2.24028	4.5758	0.870975	3.01859	1.75526	1.59735	0.842005	3.06835	2.84053	6.73286	3.09329	3.3479	3.09029	3.04394	2.10668	2.49941	3.40144	5.16747	6.22502	9.70459	2.39313	4.14052	2.20098	3.74571	3.05766	8.42939	5.32999	3.94959	1.95314	2.98356	3.74493	3.01283
Tm	0.366038	0.339266	0.448696	0.423671	0.862393	0.597089	0.342521	1.6648	0.379358	0.762112	0.218684	0.514888	0.279907	0.275278	0.136212	0.510135	0.472398	1.09027	0.522192	0.539073	0.508535	0.483283	0.338666	0.39309	0.509479	0.824245	0.992084	1.75424	0.420442	0.675502	0.345761	0.630612	0.469412	1.32471	0.853498	0.637405	0.304411	0.491706	0.588432	0.4651
Yb	2.66396	2.45535	3.55322	3.52643	6.34586	4.64575	2.67845	15.6563	2.96299	6.10499	2.1448	4.01869	2.14647	2.11592	1.00587	3.94233	3.49166	8.10301	4.13812	4.00393	3.66941	3.55276	2.50977	2.90521	3.83186	6.16789	7.19139	14.4009	3.6132	4.96005	2.76416	4.61055	3.39677	10.0438	6.66737	4.69546	2.32116	3.76972	4.38085	3.37565
Lu	0.42015	0.396295	0.553795	0.609522	1.00065	0.730519	0.436025	3.06493	0.449088	0.981402	0.453588	0.657081	0.338466	0.337188	0.1561	0.643561	0.57235	1.27997	0.605686	0.654915	0.55519	0.552015	0.398147	0.45798	0.586839	0.99337	1.17433	2.44284	0.611808	0.790061	0.45799	0.734818	0.508903	1.54624	1.0692	0.71694	0.36082	0.608972	0.662149	0.538182
			With flat MREE-HREE
																																														megacrysts
	3	7	8	15	18	27	32	34	41	50	63	69	70	89	93	98	105	117	125	133	138	148	153	156	166	167	175	176	180	186	188	189	192	195	197	201	204	214	217	88	43	53	36	28	129	20	199	200	145
SiO2	41.549	41.965	41.726	41.833	41.653	41.772	41.719	41.851	42.102	41.867	41.982	42.198	41.971	41.646	41.964	41.931	42.552	41.884	42.052	41.581	41.805	42.158	42.028	42.369	42.187	41.686	41.716	42.299	42.024	41.81	41.918	41.608	41.939	41.824	42.229	41.42	41.799	41.917	41.664	41.646	41.653	42.025	42.443	42.21	41.883	42.141	42.018	42.106	42.512
TiO2	0.169	0.242	0.11	0.022	0.099	0.222	0.179	0.231	0.293	0.057	0.179	0.064	0.115	0.019	0.083	0.081	0.067	0.084	0.309	0.095	0.112	0.208	0.228	0.103	0.118	0.092	0.095	0.234	0.108	0.031	0.03	0.147	0.101	0.064	0.291	0.084	0.234	0.069	0.327	0.019	0.069	0.051	0.032	0.068	0.069	0.475	0.43	0.6	0.428
Al2O3	19.284	22.137	21.447	20.193	20.983	19.828	19.058	19.353	19.901	22.061	20.615	22.819	21.186	21.222	21.115	21.912	22.596	21.729	22.124	20.364	20.796	21.104	20.826	22.756	21.802	19.662	21.19	21.358	22.288	22.053	21.903	20.962	21.307	21.181	20.536	19.078	20.21	21.83	19.221	21.222	20.889	21.704	23.001	22.523	21.589	20.214	19.343	19.787	19.512
Cr2O3	5.387	1.556	2.687	4.244	3.119	4.334	5.584	5.177	4.218	1.771	2.869	0.694	2.869	2.983	2.774	2.046	1.687	2.325	1.71	4.178	3.585	2.951	3.306	0.985	2.132	5.021	2.937	2.513	1.471	1.783	1.868	3.032	2.55	3.03	3.514	5.614	4.139	2.085	4.306	2.983	3.452	2.406	0.943	1.39	2.493	3.864	4.705	3.849	3.463
FeO	7.026	8.552	8.914	7.992	8.62	7.894	7.185	6.841	6.559	8.934	8.231	9.416	7.964	8.245	8.85	8.579	6.572	8.444	8.722	7.655	8.075	8.075	7.438	7.495	7.883	7.912	8.673	7.797	8.952	9.257	8.442	8.651	8.67	7.565	6.196	8.519	8.261	7.872	8.411	8.245	7.507	8.335	7.257	7.758	8.337	6.625	5.964	6.875	6.804
MnO	0.426	0.351	0.564	0.497	0.502	0.408	0.418	0.362	0.309	0.482	0.377	0.395	0.549	0.462	0.507	0.467	0.398	0.403	0.37	0.424	0.37	0.396	0.335	0.259	0.446	0.471	0.474	0.35	0.498	0.321	0.434	0.438	0.433	0.366	0.297	0.517	0.41	0.538	0.274	0.462	0.375	0.543	0.359	0.339	0.5	0.298	0.263	0.296	0.223
MgO	20.437	19.889	18.859	18.67	18.853	20.028	19.4	20.626	20.881	19.421	20.064	19.892	19.197	19.098	18.775	19.675	21.087	19.378	19.57	19.103	19.066	20.169	20.343	20.86	20.008	19.637	18.81	20.527	19.167	18.843	19.626	18.841	19.259	19.778	21.293	18.677	19.943	19.808	19.949	19.098	19.183	19.05	21.01	20.442	19.256	21.241	21.354	20.718	21.414
CaO	5.25	5.142	5.855	6.66	6.206	5.195	6.199	5.216	5.423	5.328	5.158	4.476	5.749	6.056	5.919	5.226	4.86	5.942	5.235	6.656	6.179	4.811	5.127	4.984	5.205	5.643	6.006	5.007	5.383	5.782	5.224	5.768	5.485	5.433	5.034	5.972	4.684	5.629	5.292	6.056	6.364	5.67	4.652	4.744	5.593	5.188	5.233	5.296	5.153
Na2O	0.033	0.087	0.021	0.022	0.008	0.003	0.108	0.087	0.041	0.073	0.087	0	0.064	0.019	0	0.059	0.024	0.067	0.095	0	0	0.062	0.057	0.06	0.029	0.012	0.067	0.021	0.013	0.009	0.025	0	0	0.03	0.054	0.092	0.075	0	0.044	0.019	0.014	0.026	0.029	0.046	0.005	0.018	0.05	0.029	0.055
Total	99.561	99.921	100.183	100.133	100.043	99.684	99.85	99.744	99.727	99.994	99.562	99.954	99.664	99.75	99.987	99.976	99.843	100.256	100.187	100.056	99.988	99.934	99.688	99.871	99.81	100.136	99.968	100.106	99.904	99.889	99.47	99.447	99.744	99.271	99.444	99.973	99.755	99.748	99.488	99.75	99.506	99.81	99.726	99.52	99.725	100.064	99.36	99.556	99.564
mg#	0.83831	0.805649	0.790402	0.806349	0.795852	0.818914	0.827963	0.843116	0.850176	0.79486	0.812905	0.79016	0.811197	0.805018	0.790855	0.803452	0.851172	0.803555	0.799974	0.816448	0.808007	0.816581	0.829787	0.832239	0.818973	0.81563	0.794482	0.824333	0.792374	0.783934	0.805592	0.795164	0.798362	0.823322	0.859658	0.796243	0.811428	0.817687	0.808705	0.805018	0.819974	0.80291	0.837673	0.824458	0.804569	0.851076	0.864535	0.843049	0.84871
Ni ppm	32.0815	30.8432	17.1128	22.9649	21.7845	43.4764	16.7486	49.2575	86.3644	17.1545	44.0136	20.7468	17.4143	27.918	18.6458	38.9073	26.698	21.0778	43.5645	22.0449	23.4443	76.0568	59.3193	78.5249	30.013	25.6212	21.7391	48.1447	140.707	32.2589	17.7416	18.8795	25.8015	27.5536	91.8599	24.6936	34.8922	15.0637	116.044	19.8092	16.4825	19.0148	47.0593	40.5817	20.1353	84.5048	114.631	96.3689	227.426
T	950.501	939.469	795.315	862.738	850.023	1042.95	790.698	1085.1	1313.69	795.841	1046.98	838.514	799.095	912.413	814.139	1007.6	900.668	842.22	1043.61	852.862	867.795	1255.46	1153.11	1269.69	931.938	890.052	849.526	1077.19	1585.63	952.062	803.153	816.928	891.846	908.935	1343.59	880.704	974.721	768.507	1467.83	827.823	787.285	818.533	1069.38	1020.79	831.574	1303.41	1460.85	1367.59	1962.52
Cs	0.0374179	0.0869023	0.0613373	b.d.l.	b.d.l.	b.d.l.	0.0552148	0.0323201	0.119037	0.00385752	0.0449579	0.149262	0.0337812	b.d.l.	b.d.l.	0.114448	0.00017777	0.116811	0.0113712	0.156593	0.0652943	0.16753	0.227789	0.188827	b.d.l.	b.d.l.	b.d.l.	b.d.l.	b.d.l.	b.d.l.	b.d.l.	b.d.l.	b.d.l.	b.d.l.	0.747674	b.d.l.	b.d.l.	0.0609985	b.d.l.	b.d.l.	0.27457	0.261633	b.d.l.	0.381341	0.285181	b.d.l.	0.105858	b.d.l.	0.220286
Rb	b.d.l.	b.d.l.	b.d.l.	0.649844	0.00828602	0.00617264	0.0137756	0.0501465	b.d.l.	0.011491	0.0149456	0.270851	0.0371978	b.d.l.	b.d.l.	b.d.l.	b.d.l.	b.d.l.	b.d.l.	0.0319871	b.d.l.	b.d.l.	0.317561	0.393955	b.d.l.	0.328013	b.d.l.	b.d.l.	b.d.l.	0.20548	b.d.l.	b.d.l.	b.d.l.	b.d.l.	0.386884	b.d.l.	b.d.l.	0.0570161	b.d.l.	b.d.l.	0.730596	0.11078	b.d.l.	0.0026361	0.220761	b.d.l.	0.14799	0.154311	0.0604931
Ba	0.160982	0.467842	0.00422611	2.49637	b.d.l.	0.143527	0.0110213	0.240408	0.00939203	0.271391	0.647706	0.823742	0.192438	0.24285	0.0198059	0.399768	0.406705	0.00282728	b.d.l.	b.d.l.	0.0556186	0.0352611	1.45976	0.226536	0.00182516	1.12209	0.00120085	0.149478	0.111555	1.39932	0.0439083	0.0148646	0.00115444	0.0404755	0.0268467	0.0419329	0.380059	0.00378278	0.00253674	0.0361096	2.36589	0.308878	0.0194238	0.599852	1.19371	0.0297085	0.144203	0.279354	0.0116645
Th	0.0406974	0.0929671	0.000329543	0.0828505	0.000230072	0.0469347	0.000748451	0.0332886	0.0110856	0.18384	0.0317665	0.0384445	0.00633713	0.0512039	0.000376451	0.0421907	0.0393856	0.00142677	0.0096402	0.000399265	0.0087404	0.0477283	0.235355	0.0533063	0.000433317	0.363434	0.00553355	0.0498757	0.0135256	0.0239069	0.0108687	0.00102846	0.00173857	0.0015022	0.00513435	0.0114826	0.0164493	0.00637805	0.0108761	0.0560013	0.10786	0.0119453	0.0248898	0.0118441	0.0167242	0.0100889	0.014572	0.0201226	0.0144153
U	0.155068	0.0474952	0.00271531	0.0417943	0.00141305	0.04904	0.001909	0.0663434	0.0154248	0.232898	0.0316144	0.00914686	0.00154033	0.01982	0.00371223	0.32315	0.019037	0.00282632	0.0131555	0.00247146	0.0399824	0.073219	0.0195975	0.00407032	0.00430126	0.0884073	0.00693182	0.161596	0.016837	0.0084169	0.0812158	0.00269695	0.00960316	0.00256448	0.00861454	0.0481379	0.0140382	0.0740943	0.0137023	0.110289	0.0171908	0.00555924	0.123067	0.00913371	0.00619634	0.00794288	0.0158354	0.0123572	0.012518
Nb	0.0928026	0.940828	0.0297479	0.240176	0.0256124	0.267331	0.0213957	0.613528	0.447609	4.41262	0.0545575	0.0737971	0.220781	0.0744424	0.0626879	1.52367	1.4309	0.0221579	0.0402085	0.0210342	0.773611	0.346912	0.264157	0.0321822	0.0282521	0.441414	0.08752	0.12428	0.34467	0.0347453	0.0146977	0.0250026	0.0487565	0.0243669	0.377487	0.243261	0.0590063	0.0202618	0.42264	0.0270597	0.160023	0.049238	0.0107201	0.0327406	0.0993996	0.297191	0.65576	0.372764	0.353229
Ta	0.00488178	0.055298	0.0004066	0.01244	0.00126544	0.0141237	0.00015114	0.0445537	0.0293021	0.0896027	0.0066159	0.00309859	0.00765327	0.00495664	0.00280879	0.0933584	0.0330472	0.000192079	0.00155614	b.d.l.	0.0110674	0.0325998	0.0248046	0.00405509	0.000494468	0.0205915	0.000450298	0.00788641	0.0346318	0.00292894	b.d.l.	0.00108266	0.0023532	b.d.l.	0.0313233	0.0149702	0.00133065	0.000319481	0.0339044	0.000445499	0.00729718	0.00201707	0.00122888	0.00113929	0.00330802	0.0266254	0.0738616	0.0325763	0.0231929
La	0.123297	1.46541	0.00364791	0.231933	0.00572086	0.0873978	0.00246832	0.11796	0.0403022	0.533942	0.0686934	0.133068	0.0500806	0.0713072	0.0102732	1.75969	0.305091	0.00356491	0.0174173	0.00781088	0.275072	0.0281656	0.231059	0.175929	0.00649496	0.49786	0.0149811	0.0395465	0.054703	0.114484	0.0565397	0.00314768	0.00619989	0.0212047	0.0266807	0.046829	0.0480672	0.0197408	0.0399332	0.0986284	0.377181	0.0603742	0.00697167	0.794385	0.690607	0.0323935	0.0576447	0.0572228	0.0755564
Ce	1.029	2.72474	0.0784281	0.630063	0.0944119	0.888044	0.0483766	1.13137	0.521176	0.897941	0.308222	0.281305	0.10089	0.291111	0.0903756	3.80075	0.795682	0.0690581	0.177121	0.16629	0.959503	0.495072	0.935176	0.555661	0.135275	1.58081	0.147772	0.156884	0.572768	0.249215	0.549265	0.0578258	0.0733275	0.193579	0.346878	0.4878	0.187656	0.276384	0.469126	0.830278	0.999	0.141734	0.0651719	1.17331	1.38208	0.329046	0.559962	0.383135	0.749783
Pr	0.267623	0.248644	0.0439536	0.128106	0.0599202	0.246298	0.0435788	0.353507	0.184155	0.269906	0.0808989	0.0735482	0.0272639	0.0475197	-0.0418826	0.409676	0.216775	0.0372393	0.0765868	0.144419	0.0746274	0.208081	0.121004	0.180438	0.11988	0.313234	0.0799171	0.0418616	0.165872	0.0393435	0.165407	0.0427767	0.0278079	0.0824394	0.134924	0.151358	0.046706	0.138001	0.156809	0.100731	0.142458	0.0490874	0.0230371	0.145737	0.148881	0.144822	0.183308	0.112673	0.204083
Sr	0.39103	2.53045	0.0607323	0.559379	0.148097	0.483948	0.0589516	0.694858	0.544599	0.307184	0.256538	0.604467	0.13794	0.667353	0.208297	16.8586	3.11749	0.0819239	0.348128	0.127688	0.648708	0.505982	1.65949	1.9724	0.550276	0.939111	0.145823	0.150854	0.646768	0.71498	0.131426	0.0727336	0.0741392	0.229901	0.538265	0.204757	0.35035	0.142812	0.459113	0.158653	0.772119	0.252098	0.113413	5.25798	2.3462	0.588448	0.587283	0.433444	0.943452
Nd	2.27746	1.0292	0.557724	0.982623	0.867585	1.93791	0.807947	3.29716	1.71607	2.83061	0.953346	0.645547	0.352157	0.903299	-0.014711	2.53016	2.01492	0.502723	0.88412	2.56267	0.633912	2.25433	1.60171	2.56951	2.10279	2.38731	1.24275	0.489281	1.58512	0.460951	1.19178	0.592005	0.364667	1.0791	1.67558	1.33709	0.45161	1.5717	1.35776	0.29708	2.26274	0.851115	0.257219	1.26374	0.860563	1.85059	1.76748	1.07412	1.8512
Zr	17.4584	49.8109	7.75466	14.2273	9.66927	41.4359	18.3761	62.8423	25.6817	10.3183	27.7906	25.2262	32.158	41.7283	9.5945	28.688	59.6332	9.28965	58.6233	45.4994	17.5204	88.8607	38.8599	60.268	39.5693	23.4937	29.0276	16.6168	58.6918	20.7873	3.19588	18.009	9.119	24.2383	70.526	18.8672	22.6658	21.3456	12.1395	3.60643	17.0529	17.4091	114.53	55.5868	65.6382	117.062	35.1849	48.966	45.8667
Hf	0.344588	0.981732	0.17241	0.269564	0.196288	0.639836	0.350752	0.93403	0.63347	0.227354	0.599154	0.437882	0.767235	0.98777	0.26359	0.373952	0.924243	0.253997	1.12303	0.596172	0.430087	0.968847	0.657806	1.83127	0.639239	0.397315	0.668438	0.422715	1.48836	0.260025	0.0747566	0.376306	0.231022	0.391223	1.44083	0.209777	0.324278	0.357605	0.216339	0.0789627	0.32625	0.303981	1.86105	0.817526	1.16017	2.9882	0.991791	1.19363	1.04819
Sm	1.15619	0.842084	0.461136	0.628236	0.726518	1.2686	1.17369	2.11545	0.977169	1.55498	0.786511	0.88366	0.846118	0.567062	-0.632806	1.79704	2.11729	0.498551	1.13498	2.26902	0.575197	1.78204	1.35622	2.79449	2.22666	1.32955	0.699825	0.514645	1.16065	0.627357	0.517837	0.656758	0.368394	1.22755	1.28218	1.15583	0.691779	1.66891	0.655324	b.d.l.	1.43004	0.970133	0.270567	1.34313	1.21566	1.68177	1.12602	0.90558	1.11324
Eu	0.430716	0.505147	0.221134	0.251871	0.283883	0.563627	0.530135	0.878321	0.432524	0.510906	0.318851	0.57038	0.433816	0.496267	0.209175	0.931354	1.07143	0.288638	0.684154	0.777402	0.281314	0.857703	0.644437	1.26438	0.98242	0.559693	0.286908	0.260778	0.595459	0.279281	0.20159	0.339862	0.186786	0.628595	0.535987	0.625157	0.409664	0.748916	0.243314	0.0760087	0.447684	0.500482	0.114299	0.769537	0.645498	0.714475	0.46306	0.441311	0.52358
Ti	1452.26	3422.03	862.894	187.436	694.647	2004.09	1472.84	1953.29	2692.68	585.799	1595.33	1940.38	1129.29	1420.38	753.369	1299.96	852.082	1105.28	3933.1	477.775	1127.34	2284.41	1948.6	1364.35	1180.12	886.127	839.887	1984.58	6243.31	327.061	284.583	1037.62	792.899	638.179	2718.73	862.326	2147.05	232.542	2656.36	259.994	628.388	526.303	318.95	951.486	1128.54	4105.93	4021.39	4526.23	4502.96
Gd	1.42762	2.32283	0.798903	0.876865	1.1079	1.83035	1.97943	3.12452	1.78946	2.20777	1.43566	2.58206	2.22622	1.75427	0.824102	3.06896	4.12088	1.08186	3.01865	2.93224	1.17965	3.04922	2.22899	4.75137	3.40712	2.13611	1.15954	1.01435	2.10996	0.963135	0.803408	1.44244	0.87472	2.0391	1.83329	2.34291	1.6297	3.00392	0.717833	0.290769	1.53728	1.5169	0.422177	3.06647	2.85058	2.45913	1.96221	1.78271	1.80893
Tb	0.276362	0.560201	0.158191	0.152229	0.208371	0.343531	0.367133	0.526936	0.349016	0.457239	0.293788	0.660373	0.516257	0.344977	0.256827	0.632201	0.753582	0.2364	0.714364	0.480071	0.277425	0.602736	0.409444	0.920019	0.642723	0.396987	0.321499	0.242932	0.46931	0.167882	0.226893	0.31599	0.233578	0.39179	0.316588	0.495703	0.32717	0.594607	0.126033	0.0907489	0.27714	0.262975	0.0803367	0.640258	0.594807	0.432401	0.369738	0.374833	0.367085
Dy	2.01503	4.90355	1.34541	1.03756	1.77221	2.40754	2.79917	3.76913	2.84812	3.83917	2.52155	5.41676	4.23096	2.43239	2.53263	5.02511	6.17209	2.02001	6.10756	3.61693	2.46095	4.21524	3.49198	7.37168	5.35541	3.11263	2.99171	2.11782	3.80976	1.14577	2.02215	2.68186	2.21448	3.13675	2.45571	3.60449	2.39352	4.50594	0.900419	1.0619	1.95278	2.08076	0.698696	5.49625	4.94572	3.13335	2.95951	2.91288	2.69604
Y	12.1826	31.998	8.90318	5.63989	12.201	13.6551	16.1021	19.7057	18.0985	24.7539	16.6801	34.9096	25.6936	14.8733	18.5515	31.676	43.3506	11.8422	38.0239	25.1067	16.8286	23.8504	21.7087	48.0718	35.3527	17.1583	19.9444	13.7245	21.486	6.94648	14.9633	17.9594	15.169	20.7736	14.7041	19.3989	12.7302	27.9539	6.11511	9.98046	12.024	13.9855	5.93185	36.7847	33.2119	40.8473	18.5539	17.0212	15.8077
Ho	0.463551	1.16485	0.324164	0.220113	0.452309	0.517147	0.601996	0.758195	0.686242	0.913856	0.601659	1.33271	1.0231	0.519601	0.672919	1.15287	1.58268	0.461296	1.41488	0.840419	0.622161	0.887277	0.820228	1.75835	1.27545	0.653584	0.7379	0.510514	0.812614	0.242004	0.527734	0.663789	0.570328	0.729254	0.545992	0.713145	0.468526	0.948279	0.195372	0.329208	0.400586	0.468689	0.190724	1.39285	1.23662	0.675313	0.680543	0.6565	0.594906
Er	1.37313	3.64938	1.08002	0.683788	1.63346	1.58687	1.81845	2.22552	2.06852	2.90686	1.9803	4.2855	3.19162	1.6539	2.30943	3.67986	5.62478	1.40822	4.19418	2.77299	1.93811	2.68073	2.50905	5.94404	4.10377	1.98634	2.42715	1.67063	2.31201	0.843322	1.69851	2.24068	1.85252	2.4531	1.66678	1.89954	1.36065	2.9522	0.671711	1.30438	1.30071	1.60231	0.820651	4.97023	4.33174	2.15333	2.29316	1.97277	1.79273
Tm	0.217962	0.590397	0.176067	0.108239	0.263814	0.264612	0.268251	0.313392	0.334934	0.448477	0.341922	0.720253	0.508789	0.259444	0.365113	0.60447	0.956152	0.208397	0.618858	0.483887	0.323559	0.40043	0.415034	1.00276	0.651828	0.292126	0.386085	0.265707	0.326066	0.134147	0.280175	0.367544	0.318637	0.387025	0.260454	0.266991	0.208566	0.476516	0.118257	0.254284	0.20767	0.305528	0.154576	0.826231	0.739946	0.331212	0.343647	0.282516	0.261412
Yb	1.59693	4.17888	1.40362	0.993704	2.18996	1.89217	1.98823	2.3587	2.4743	3.5648	2.58158	5.26202	3.67426	1.87245	2.82024	4.4223	7.35426	1.48368	4.50946	3.70099	2.37087	3.02808	3.03465	7.84661	4.85346	2.08452	2.90494	2.0852	2.28211	1.05931	2.20911	2.78226	2.34512	3.01708	2.09972	1.76821	1.46811	3.69114	0.994047	2.18576	1.64212	2.66672	1.47809	6.80982	5.87634	2.37909	2.61333	2.10847	1.86946
Lu	0.244024	0.609028	0.227637	0.189718	0.366241	0.309948	0.312472	0.368716	0.392448	0.516836	0.39913	0.862091	0.593795	0.317834	0.469014	0.693804	1.19584	0.223375	0.657502	0.60843	0.387233	0.457257	0.433684	1.31885	0.788717	0.324462	0.46765	0.337168	0.348942	0.180429	0.351952	0.443131	0.388639	0.469959	0.352749	0.285971	0.236612	0.603212	0.171184	0.382025	0.269472	0.508468	0.273468	1.1955	1.02721	0.381343	0.385215	0.316471	0.27859
			With humped REE
									high-Ti grains
	119	155	185	207	216	67	151	171	44	203	174
SiO2	41.586	41.492	42.052	41.775	41.139	42.185	41.923	40.954	41.517	41.854	41.579
TiO2	0.239	0.259	0.012	0.33	0.284	0.321	0.294	0.069	0.551	0.853	0.512
Al2O3	18.12	18.629	19.781	19.59	15.941	19.123	18.826	16.668	18.111	18.966	18.592
Cr2O3	6.787	5.747	4.992	4.568	9.088	4.972	5.529	8.717	6.425	4.817	5.304
FeO	7.085	6.788	7.059	7.098	6.051	7.131	5.768	7.325	6.606	6.667	6.455
MnO	0.398	0.327	0.419	0.343	0.285	0.324	0.277	0.428	0.363	0.275	0.278
MgO	20.118	20.083	21.649	20.446	19.714	21.22	20.85	18.698	20.059	20.858	20.608
CaO	5.468	5.862	3.109	5.101	6.646	4.455	5.688	6.815	6.225	5.176	5.719
Na2O	0.093	0.035	0.076	0.091	0.033	0.083	0.02	0.061	0.109	0.115	0.059
Total	99.894	99.222	99.149	99.342	99.181	99.814	99.175	99.735	99.966	99.581	99.106
mg#	0.835018	0.8406	0.845357	0.836984	0.853095	0.841372	0.865647	0.819816	0.844051	0.847942	0.850535
Ni ppm	59.7277	88.6349	42.6318	60.0205	89.3795	114.623	96.7468	40	42.1751	86.9252	90.3543
T	1155.75	1326.13	1036.56	1157.64	1330.18	1460.81	1369.59	1016.24	1033.08	1316.78	1335.47
Cs	0.117751	0.33297	b.d.l.	b.d.l.	b.d.l.	0.225759	0.905261	b.d.l.	b.d.l.	0.0802889	b.d.l.
Rb	b.d.l.	0.15095	b.d.l.	b.d.l.	0.00607459	0.219114	1.1522	b.d.l.	b.d.l.	0.638635	0.00623528
Ba	0.0127963	0.0209374	0.265886	0.00796412	0.188855	3.44679	7.79407	0.399366	0.0172499	0.0345875	0.00938203
Th	0.0156094	0.0113546	0.0623454	0.00330477	0.0342302	0.0755788	0.151939	0.0635641	0.00570773	0.0149296	0.0210896
U	0.0530462	0.0243855	0.164971	0.0108883	0.0360205	0.00957158	0.0521111	0.125493	0.354755	0.353763	0.31827
Nb	0.851227	0.524439	0.71072	0.287966	0.869848	0.311062	0.842817	0.560292	0.0172482	0.0274946	0.0248327
Ta	0.0579895	0.041503	0.0441134	0.0147159	0.0990842	0.021633	0.0789703	0.0298001	0.0481132	0.195553	0.0941321
La	0.0915579	0.0831402	0.251818	0.0230202	0.105665	0.105166	0.885471	0.253039	0.367516	1.5843	1.37593
Ce	1.13155	1.04449	3.78878	0.315175	0.97421	0.391315	3.62154	2.74418	0.128268	0.533164	0.582044
Pr	0.460701	0.381295	1.36468	0.150963	0.325744	0.0959403	0.852466	0.994649	0.290409	2.16194	2.59992
Sr	0.751183	0.934951	1.7859	0.484053	0.771502	2.37519	5.05794	1.4371	1.69792	4.79004	7.16633
Nd	5.0179	3.80245	11.0181	1.82019	3.06232	1.14545	5.53444	9.11846	56.3208	235.582	149.262
Zr	137.532	151.134	56.0186	236.617	37.5871	30.6919	32.0966	136.663	1.62214	4.5805	3.10253
Hf	1.57242	2.8346	0.532496	3.71102	0.81808	0.623602	0.836938	1.44475	2.22475	2.3943	4.69
Sm	3.89062	2.40422	3.63545	1.96555	1.89221	1.54302	1.97444	4.90203	1.14733	0.919137	1.52306
Eu	1.77285	0.928276	1.30991	1.00187	0.655398	0.728687	0.714703	1.92642	4054.21	6530.4	3709.83
Ti	2354.73	2553.15	217.012	2570.47	2235.68	3316.11	2528	385.554	4.75649	3.09761	3.87702
Gd	6.02194	2.66583	4.15044	4.22748	1.81109	2.72129	2.28225	4.96552	0.83388	0.507023	0.526781
Tb	0.986678	0.384941	0.678447	0.781475	0.253047	0.424479	0.324283	0.826366	5.11787	3.20725	2.97163
Dy	5.95616	2.14288	4.07181	4.79823	1.4083	2.67103	2.13355	4.49712	21.2529	16.6823	13.9426
Y	28.0467	9.92565	17.9683	21.6177	6.6333	14.1838	11.4465	18.4204	0.859761	0.641719	0.513238
Ho	1.05236	0.38279	0.648902	0.824154	0.224515	0.523775	0.43081	0.695933	2.05906	1.76603	1.43424
Er	2.65766	1.0349	1.4181	1.96841	0.68453	1.62666	1.24059	1.4978	0.259143	0.25225	0.200633
Tm	0.345784	0.158012	0.166332	0.261843	0.0998105	0.263596	0.170022	0.190863	1.70062	1.77944	1.50226
Yb	2.3513	1.21545	1.10243	1.76492	0.71004	2.06744	1.38409	1.31135	0.232269	0.274149	0.233752
Lu	0.346972	0.202174	0.195454	0.26866	0.124332	0.358654	0.204171	0.223745	1.08047	1.35575	3.27002
		With sinusoidal REE
	low-chromium grains																										high-chromium grains
	5	13	14	38	39	62	95	92	108	130	147	154	173	190	194	210	218	219	46	33	6	131	150	81	96	45	30	47	57	121	127
SiO2	41.658	41.782	41.934	41.97	41.958	41.896	42.345	41.878	42.031	41.589	41.85	41.957	41.71	42.304	42.16	41.974	42.198	41.896	42.027	41.989	41.931	42.453	42.016	41.645	42.072	41.945	41.673	42.033	41.548	40.803	41.422
TiO2	0.04	0.016	0.004	0.027	0.011	0.006	0.007	0.015	0.012	0.036	0.238	0.082	0.018	0.035	0.006	0.013	0	0.024	0.014	0.156	0.021	0	0.005	0.057	0	0.009	0.023	0.05	0.214	0.731	0.104
Al2O3	21.961	20.92	21.379	21.313	20.925	21.041	21.967	21.228	21.552	21.168	18.788	21.88	21.159	22.348	22.015	21.055	22.438	21.009	20.693	19.536	21.695	22.42	21.484	20.843	21.252	21.478	18.635	17.62	17.667	14.433	17.332
Cr2O3	1.17	3.425	2.904	3.055	3.499	3.197	2.262	2.973	2.808	2.807	5.177	2.058	3.059	1.886	2.158	3.108	1.712	3.342	4.021	4.834	2.309	1.726	2.907	3.401	3.173	2.67	6.702	7.954	6.996	11.186	7.771
FeO	12.202	7.617	7.665	7.48	7.08	7.828	7.413	7.665	7.539	8.133	6.532	8.121	8.028	7.762	7.183	7.858	7.96	7.879	7.941	7.001	8.01	7.104	7.272	8.404	7.605	7.83	8.225	5.943	7.001	6.243	6.955
MnO	0.341	0.395	0.414	0.423	0.365	0.448	0.43	0.487	0.447	0.505	0.27	0.439	0.457	0.466	0.373	0.482	0.518	0.478	0.569	0.321	0.442	0.379	0.368	0.479	0.396	0.489	0.532	0.278	0.365	0.332	0.394
MgO	18.258	19.285	19.362	19.516	19.679	19.152	20.902	19.849	19.346	19.169	20.447	19.93	19.104	21.332	20.8	19.163	20.883	18.87	21.439	20.602	19.693	22.54	20.191	18.716	20.538	19.496	19.554	23.753	19.83	19.553	19.492
CaO	4.286	6.283	6.05	6.152	6.286	6.253	4.234	5.373	6.127	5.965	6.174	5.354	6.21	3.716	4.53	6.023	3.949	6.381	3.008	5.278	5.459	2.859	5.206	6.317	4.669	6.159	4.905	1.527	6.088	6.406	6.07
Na2O	0.06	0.015	0.01	0.023	0.036	0.021	0.002	0.016	0.006	0	0.051	0	0	0.031	0.041	0.011	0.027	0.018	0.058	0.018	0.01	0.044	0.001	0	0.008	0	0.04	0.013	0.022	0.06	0.07
Total	99.976	99.738	99.712	99.959	99.839	99.842	99.562	99.484	99.868	99.372	99.527	99.821	99.745	99.88	99.266	99.687	99.685	99.897	99.77	99.735	99.57	99.525	99.45	99.862	99.713	100.076	100.289	99.171	99.731	99.747	99.61
mg#	0.727304	0.818605	0.818264	0.823026	0.832055	0.813465	0.834048	0.821929	0.820594	0.807733	0.848013	0.81393	0.809219	0.830468	0.8377	0.812971	0.823826	0.810207	0.827948	0.839877	0.814203	0.849747	0.831905	0.798774	0.82799	0.816112	0.809071	0.876909	0.834674	0.848084	0.833206
Ni ppm	19.1426	16.9477	14.6727	15.677	20.766	19.8004	31.5207	22.1983	16.9115	16.5189	133.998	19.3218	18.5164	25.074	26.0801	16.4937	21.4813	20.5256	19.5505	30	18.1647	26.8282	28.8795	35.8984	27.1318	10.7615	60	48	52.2243	127	58.5466
T	820.043	793.229	763.144	776.749	838.729	827.722	945.534	854.525	792.771	787.754	1554.28	822.15	812.587	884.561	894.606	787.429	846.694	836.018	824.823	931.819	808.334	901.936	921.47	983.139	904.878	703.865	1157.51	1076.15	1105.79	1521.07	1148.09
Cs	0.092055	0.308042	0.123928	b.d.l.	0.328053	0.0593139	0.555332	b.d.l.	b.d.l.	0.299025	0.134838	0.412855	b.d.l.	b.d.l.	b.d.l.	b.d.l.	b.d.l.	0.00715439	0.138939	0.110004	0.1048	0.3245	0.93862	b.d.l.	0.361461	0.0238651	0.160817	0.041909	0.153847	0.113543	0.505012
Rb	1.61129	0.0306129	b.d.l.	b.d.l.	0.026635	b.d.l.	b.d.l.	b.d.l.	b.d.l.	0.17515	b.d.l.	0.249353	b.d.l.	b.d.l.	0.129415	b.d.l.	b.d.l.	0.27832	0.449344	0.450123	0.482749	0.259617	2.2862	0.0571971	b.d.l.	b.d.l.	0.286502	0.0119195	0.303484	b.d.l.	0.314915
Ba	5.76699	0	0	0.00766788	0.00454218	0.167719	0.0018535	0.0370436	0.299986	0.013868	0.00561343	0.00186839	0.0361851	b.d.l.	1.48717	0.0522493	0.862229	0.703086	1.45412	1.32688	3.09201	0.0414176	8.21543	0.203389	0.00387598	0.0356537	0.907449	0.0752198	0.908652	0.445046	0.00164579
Th	0.189981	0.00382105	0.00138345	0.00160071	0.00154238	0.00471083	0.254685	0.00203215	0.01259	0.00424669	0.0396972	0.000221657	0.023157	0.00142845	0.034264	0.00590895	0.0475101	0.030294	0.315228	0.0416525	0.0714121	0.0256426	0.346333	0.0661466	0.00175994	0.0227441	0.0383446	0.0748815	0.0215771	0.0346419	0.0336557
U	0.0169703	0.0150318	0.00933767	0.0118746	0.0133116	0.00223675	0.102618	0.00962086	0.00468028	0.115443	0.0391767	0.00282121	0.0526102	0.000922233	0.00631577	0.0144134	0.141773	0.0234897	0.0440385	0.0162086	0.221313	0.247526	0.0508661	0.111715	0.018367	0.103876	0.0728712	0.0429936	0.0133024	0.0674226	0.114529
Nb	0.157286	0.0457484	0.0154036	0.0249652	0.0205952	0.0286164	1.37469	0.0966979	0.0295886	0.0190957	0.889957	0.0256959	0.059527	0.0231111	0.103891	0.121169	0.0224068	0.221916	0.456841	0.37109	0.116313	0.0414456	0.884695	0.347973	0.111921	0.0182568	0.291902	1.61669	0.324379	1.2751	0.540746
Ta	0.00879679	0.00271231	0.000422821	0.000600654	0.00155	0.00175854	0.0511597	0.00698164	0.00137289	0	0.103909	0.00177086	0.00666567	0	0.00719128	0.00943548	0	0.0176554	0.0882419	0.0354472	0.00330404	0	0.252533	0.0147535	0.0112516	0.000589926	0.0066032	0.105183	0.0306965	0.0434911	0.0615814
La	1.24592	0.0216633	0.0108951	0.0085869	0.0107402	0.0329065	3.50201	0.0216894	0.0360049	0.0388637	0.131774	0.00244856	0.0516172	0.00456712	0.190409	0.0268993	0.0791837	0.320435	0.335704	0.216174	0.354969	0.100547	2.78333	0.669712	0.0579105	0.0533053	0.298673	0.229991	0.0821323	0.10645	0.127755
Ce	1.18427	0.542997	0.144463	0.154877	0.735885	0.224179	15.6029	1.12324	0.264492	0.453434	1.55606	0.0649246	0.93621	0.0727779	0.486062	0.445713	0.928931	0.896105	1.25938	0.716056	3.61441	1.4027	8.63288	9.64259	2.65712	0.488946	2.50495	2.5471	0.389177	1.40554	2.79975
Pr	0.420604	0.375328	0.139612	0.143167	0.563473	0.161472	1.48863	0.431983	0.282027	0.17769	0.46313	0.168988	0.461021	0.0944227	0.0566699	0.278859	0.683325	0.295518	0.655942	0.229507	1.14912	0.723022	0.796372	2.25106	0.631199	0.172307	0.621738	0.735988	0.127827	0.655674	1.24833
Sr	1.07252	0.145609	0.0698386	0.139468	0.162733	0.685811	12.7885	0.481211	0.209613	0.236103	0.757671	0.0445373	0.583015	0.0672505	0.645503	0.29012	1.08421	0.605019	6.30282	1.27648	1.47175	0.696789	10.2778	8.94931	1.49192	0.360613	3.93566	1.82255	0.619206	0.756839	1.77707
Nd	3.62074	4.25379	2.33967	2.00854	4.88613	2.74926	4.04201	2.38145	4.7119	1.69238	3.66982	2.2127	5.06452	2.51055	1.55828	2.93928	11.4226	1.07318	5.75528	2.36451	13.3311	6.53707	1.66831	11.47	3.34199	1.3116	3.47037	5.5005	1.49539	2.98379	12.8544
Zr	9.40095	22.7935	6.2257	53.6451	56.0695	18.8149	24.0356	4.64472	10.6276	5.03836	16.5324	8.08724	30.0087	28.531	27.8375	18.6389	2.94902	6.58476	16.3712	62.9274	9.77565	8.27847	2.05284	1.85468	2.74922	0.128194	4.2832	11.607	32.2204	0.76138	115.765
Hf	0.217375	0.321558	0.091345	0.983952	0.707313	0.308166	0.33089	0.0753059	0.0968786	0.0599728	0.374451	0.188922	0.36237	0.622385	0.401522	0.260919	0.0297857	0.143122	0.256135	1.17297	0.0878983	0.127949	0.0742712	0.0139369	0.0371568	0.00147005	0.0794204	0.244353	0.685643	0.00358665	1.53367
Sm	2.80475	1.02588	0.590377	1.12415	1.26038	0.756553	0.867006	-0.779626	2.19668	0.560524	0.878001	0.489861	1.80508	2.25338	3.26252	0.718686	4.49587	0.233545	1.52154	1.76809	8.26316	1.72299	0.136784	1.33422	0.597029	0.170942	0.684655	1.30297	1.13328	0.298803	6.5547
Eu	1.01996	0.254135	0.122429	0.343111	0.346273	0.214798	0.305819	0.133121	0.549714	0.135044	0.259957	0.137979	0.525246	0.761758	0.875296	0.182593	0.678308	0.0628529	0.404514	0.679045	2.02443	0.290109	0.0663976	0.298156	0.143398	0.0289714	0.228895	0.312684	0.460011	0.071949	2.32376
Ti	420.502	99.6083	91.0662	190.798	114.656	192.366	142.474	66.5638	37.9039	72.0828	1009.76	1049.85	181.604	724.658	237.268	96.6058	22.0199	190.729	121.706	1142.09	56.7055	27.0026	183.131	105.369	57.5336	32.1447	102.213	228.415	1583.08	37.1713	853.621
Gd	2.62785	0.479313	0.240182	0.61206	0.867666	0.550325	1.03292	0.316765	1.05352	0.405342	0.690735	0.470306	1.04231	2.12934	1.71057	0.322157	1.1464	0.238217	1.22953	1.95839	5.06576	0.56128	0.222879	0.54134	0.270526	0.0103718	0.559366	0.800695	1.32864	0.172551	5.84587
Tb	0.2547	0.0513405	0.0309151	0.0551522	0.110589	0.0658499	0.126153	0.0318394	0.0797878	0.0596723	0.0962345	0.0795303	0.110956	0.26725	0.184121	0.03037	0.0692109	0.0436494	0.163815	0.239671	0.375555	0.0519238	0.0210935	0.0229963	0.0217624	0.00195456	0.065348	0.072044	0.173266	0.0161392	0.617804
Dy	1.29394	0.442281	0.358003	0.402057	0.590467	0.515702	0.737601	0.166379	0.305528	0.491233	0.635568	0.676989	0.69208	1.32168	0.956972	0.183408	0.212183	0.309338	0.816932	1.1688	1.00332	0.400504	0.150944	0.167627	0.161268	0.0305329	0.398619	0.274756	0.916201	0.0813454	2.62346
Y	8.56543	4.97021	4.46347	4.27148	4.35565	4.55596	4.43181	1.92655	1.61288	4.09136	3.92046	5.44614	5.08003	7.95682	5.23737	1.96519	1.46451	2.93892	5.31582	5.3315	3.90757	4.43936	1.96221	3.26774	2.55894	0.658045	1.94905	1.01156	3.52594	1.14156	8.9465
Ho	0.297209	0.170601	0.147639	0.132069	0.146174	0.156228	0.14553	0.0539474	0.0421781	0.146815	0.136096	0.187835	0.173534	0.265795	0.169117	0.057007	0.0475304	0.093909	0.150009	0.189427	0.117253	0.133845	0.0560974	0.0922978	0.0773871	0.0184116	0.0595932	0.0390672	0.136916	0.036307	0.355355
Er	1.06643	0.837921	0.805563	0.703531	0.698742	0.807101	0.589058	0.396326	0.19759	0.639587	0.497748	0.795014	0.733876	1.08591	0.703491	0.368318	0.33578	0.461167	0.405394	0.558551	0.434116	0.759131	0.500235	0.684512	0.508577	0.144562	0.162624	0.109241	0.34591	0.19915	0.696763
Tm	0.194947	0.197361	0.190111	0.166265	0.181787	0.187792	0.127296	0.114909	0.0562033	0.145301	0.0926736	0.154561	0.168738	0.264883	0.181981	0.0996089	0.155094	0.124734	0.0685341	0.0921589	0.100397	0.20344	0.144632	0.212411	0.161358	0.0471843	0.0310161	0.026463	0.0597022	0.0650513	0.101824
Yb	1.64925	1.94855	2.01644	1.80558	1.91822	2.0155	1.36147	1.48267	0.73558	1.57986	0.822823	1.24672	1.62935	2.91363	2.25121	1.14393	2.71332	1.36164	0.637929	0.901748	1.05763	2.11019	2.08366	2.37853	1.99906	0.582109	0.288542	0.399691	0.509102	0.842477	0.728782
Lu	0.287036	0.39477	0.399833	0.371139	0.421013	0.446277	0.303755	0.39503	0.172886	0.316911	0.157571	0.243326	0.337539	0.627709	0.583712	0.261349	0.802222	0.288986	0.165085	0.174312	0.228757	0.43945	0.505165	0.559651	0.469636	0.138251	0.0678544	0.136869	0.101134	0.199317	0.141415
[truncated: 5 more columns]
